# Supplementary material
Source: publisher figshare collection journal article supplement (https://acs.figshare.com/ndownloader/files/22098090)
Supplement: Supplementary file 1 [file 22098090]

## Supporting Information

# Novel N/Carbon Quantum Dots-Modified MIL-125(Ti) Composite for Enhanced Visible Light Photocatalytic Removal of NO

Meijuan Chen<sup>1,2,3\*</sup>, Xiaoyan Wei<sup>2</sup>, Liaoliao Zhao<sup>2,4</sup>, Yu Huang<sup>2\*</sup>, Shun-cheng Lee<sup>5</sup>, Wingkei Ho<sup>6</sup>, Kehao Chen<sup>3</sup>

<sup>1</sup>*School of Human Settlements and Civil Engineering, Xi'an Jiaotong University, Xi'an 710049, China*

<sup>2</sup>*State Key Laboratory of Loess and Quaternary Geology (SKLLQG), Key Laboratory of Aerosol Chemistry and Physics, Institute of Earth Environment, Chinese Academy of Sciences, Xi'an 710061, China*

<sup>3</sup>*Key Laboratory of Degraded and Unused Land Consolidation Engineering, the Ministry of Natural Resources of China, Xi'an 710075, P. R. China*

<sup>4</sup>*School of Environmental Science and Engineering, Shaanxi University of Science and Technology, Xi'an 710021, China*

<sup>5</sup>*Department of Civil and Environmental Engineering, The Hong Kong Polytechnic University, Hong Kong 999077, China*

<sup>6</sup>*Department of Science and Environmental Studies, The Education University of Hong Kong, Hong Kong 999077, China*

Submitted to *Industrial & Engineering Chemistry Research*

### **\*Corresponding Author:**

Dr. Meijuan Chen, E-mail address: chenmeijuan@xjtu.edu.cn, Tel: 86-29-8339 5107

Prof. Yu Huang, E-mail address: huangyu@ieecas.cn, Tel: 86-29-6233 6261

Table. S1. The obtained BET surface area, pore volume and pore size of MIL-125(Ti) and 2.5% Vol N/CM(Ti).

| Materials         | BET surface area<br>(m <sup>2</sup> /g) | Pore volume<br>(cm <sup>3</sup> /g) | Pore size<br>(Å) |
|-------------------|-----------------------------------------|-------------------------------------|------------------|
| MIL-125(Ti)       | 868.25                                  | 0.36                                | 19.09            |
| 2.5% Vol N/CM(Ti) | 1066.38                                 | 0.45                                | 19.21            |

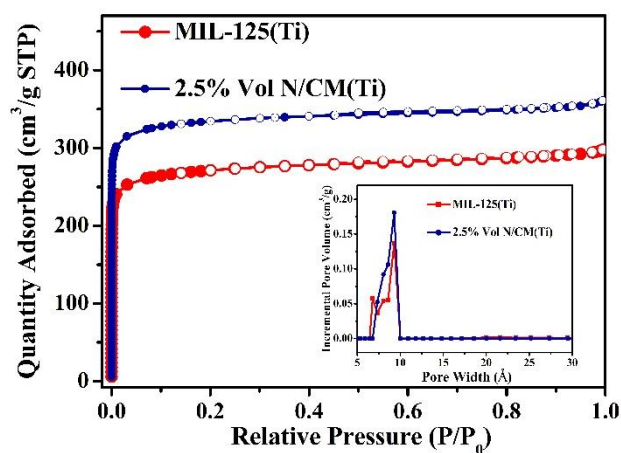

**Fig. S1.** N<sub>2</sub> adsorption-desorption isotherms of MIL-125(Ti) and 2.5 Vol% N/CM(Ti).

Inset: pore size distribution.

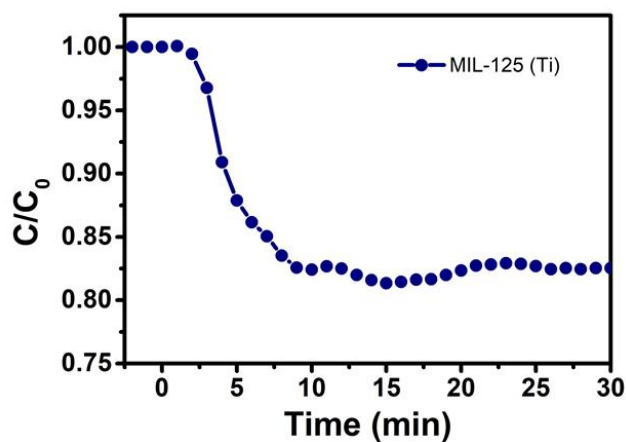

**Fig. S2.** The activity test of MIL-125(Ti) composite under the UV light irradiation.

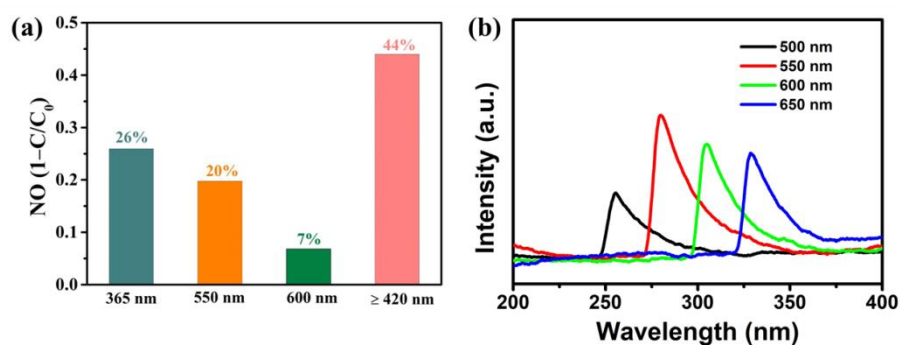

**Fig. S3.** (a) Activity of 2.5 Vol% N/CM(Ti) composite under light of different wavelengths: 365,  $\geq 420$  (420-800 nm), 550, and 600 nm. (b) The UCPL spectra of the prepared N/CQDs under 500, 550, 600, 650 nm.

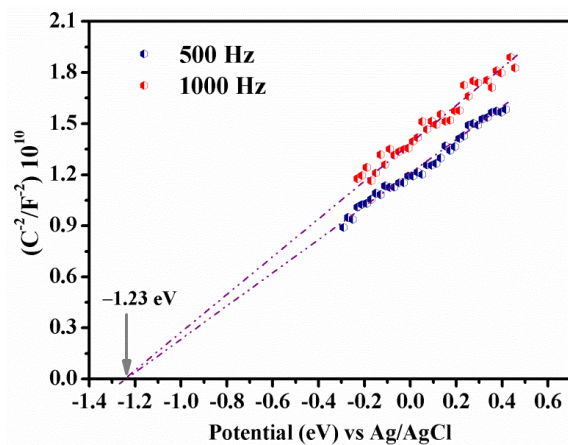

**Fig. S4.** Mott-Schottky plots of MIL-125(Ti) at a frequency of 500 and 1000 Hz.
